# Supplementary material
Source: Elsevier journal article supplement (https://www.sciencedirect.com/science/article/pii/S2173572712000690)
Supplement: mmc1 [file S2173572712000690:mmc1.doc]

**Figure 1. Abdominal pain suggestive of acute pancreatitis**

**Mapa Conceptual de**

**Manejo de la PAG en UCI**

**Mapa Conceptual de**

**Manejo de la PAG en UCI**

Clinical History

Physical examination

Initial AP pancreatic

Abdominal ultrasound

**Alarm signs:**

**Clinical**: Abdominal defense; Pleural effusion; altered level of consciousness

**Radiological**: Pleural effusion , Free peritoneal fluid (Ultrasound)

**Analytical**: PCR >150mg/L, or progressive increase in 48h; Hematocrit >44%

**Prognostic scales**: BISAP; APACHE II >8; APACHE-0 >6; Ranson-Glasgow >3 points, EPIC score and others……

Rule out other causes

**Early criteria de severity: ≥ 1 organ failure (OF)**

Hypotension: PAS < 90 mm Hg or reduction in 40 mmHg of basal SAPl

Respiratory Failure: PaO2 < 60 mm basal Hg (without an O2 supplement)

Acute Renal Failure: Cr > 1,2 mg or a basal increase by a factor of 2; or Oliguria <30 ml in 3 h; or 700 ml in 24h

**One or more OFs**

**No organ failure (OF)**

**Mild AP**

**Potentially Severe AP - PSAP**

Admitted to a hospital room

**Consider evaluation in an ICU**

**Treatment: (*according to the acronym P.A.N.C.R.E.A.S.*):**

**P.**erfusion: Rapidly replacing intravascular volume in the first 48 hours. The > need for fluids is a sign of alarm. Both the hypo and hyper-hydration > mortality; thus a **> continuous hemodynamic control** is needed**.**  Oxygenation for a Sat O2 > 95%. **A.**nalgesia: Analgesia, including opioids. **N.**utrition: Absolute diet until instructed otherwise. **C.**línical evolution-evaluation: PCR and detecting “OF” y triage (BISAP, APACHE II, APACHE-O) in Emergency and Digestive Care. **R.**adiology: Ultrasound. TC after the first 72 h following the onset of pain. **E.**RCP-CRPE: AP + bile duct obstruction = Early CRPE <72h. Cholangitis = urgent CRPE <24h. **A.**ntibiotics: Not applicable. **S.**urgery: Not to be performed at an early stage, except in certain cases.

Continuos monitoring

Acute pancreatitis profile every 12 h

PCR (PCT) every 12 – 24 h

**GOOD RESPONSE:**

**Transitory OF**

**NO RESPONSE:**

**Persistent OF**

**Admitted to a hospital room**

**Admitted to an ICU**

Pamplona, 2th Juanary, 2012. **EXPLANATION OF THE ACUTE PANCREATITIS (AP) DIAGRAM**

**Diagnosis of AP:** Atlanta and biochemical criteria for the diagnosis of acute pancreatitis

Abdominal pain suggestive of pancreatitis and:

- Amylase >400 mg/dl (three to four times the normal value, and remain elevated in the plasma only 2 or 3 days after the onset of symptoms, unless there is acute renal failure).
- Lipasa 200 mg/dl (twice serum value)
  - Sarner M. Clinical diagnosis of interstitial –edematous- Pancreatitis. En: Acute Pancreatitis, Editor Edward L. Bradley III; Raven Press 1994, New York, Chapter 33, p. 255-259)
  - Avery et al. Management of the critically ill patient with severe acute pancreatitis. Critical Care Medicine 2004. Vol 32, N°12; 2524 – 2536.
  - Maravi Poma ET al . Decisiones en el Paciente Crítico con Infección en Pancreatitis Aguda Grave. Intensivos Vol 1. Junio 1999. Pag: 10-24.
- High index of suspicion! Be alert to unusual symptoms: Free peritoneal fluid; pancreatic encephalopathy; and other rare symptoms.
  - Estrada et al. Pancreatic encephalopathy. Acta Neurol Scand 1979; 59: 135-139. Asociado a niveles elevados de Lipasa en el LCR

**Alarm signs:** Data suggest that pancreatitis may evolve into a potentially severe PA.

- Clinical: Abdominal,defense; pleural effusion on auscultation;, altered level of consciousness. BISAP Score: B= Blood urea nitrogen (>25mg/dl) + I= Impaired mental status + S= SIRS + A= Age (>60 years) + P= Pleural effusions
- Radiological: pleural effusion (Rx), free peritoneal fluid (ultrasound).
  - [De Waele et al](http://www.ncbi.nlm.nih.gov/pubmed?term="De Waele JJ"%5BAuthor%5D). **EPIC score** (based on the presence of pleural effusion, ascites, and retroperitoneal fluid collections). Extrapancreatic inflammation on abdominal computed tomography as an early predictor of disease severity in acute pancreatitis: evaluation of a new scoring system. [Pancreas](javascript:AL_get(this, 'jour', 'Pancreas.');) 2007; 34:185-90.
- Analytical: PCR> 150mgr / L or a progressive increase in 48 hours, hematocrit >44%, PCT (constant elevation)
- Prognostic Scale: APACHE II> 8; APACHE-O> 6, SOFA, Other rating scales (Glasgow - Ranson > 3). Organ-specific scales: RIFLE / AKIN, SCG, LIS; CPIS-Score (Nosocomial Pneumonia: Clinical Pulmonary Infection Score = A value of more than 6 points is highly suggestive of pneumonia)

**Treatment - Support Measures:** “Eight” easy to remember therapeutic measures by means of the “P.A.N.C.R.E.A.S.” acronym:

Perfusion; Analgesia; Nutrition; Clinical evolution-evaluation; Diagnostic-evolutionary Radiology; ERCP-CRPE; Antibiotics; and Surgery: (Khaliq A, Dutta U, Kochhar R, Singh K. Management of Acute Pancreatitis: 'P.A.N.C.R.E.A.S.' contains Eight Easy Steps to remember the treatment. JOP. J Pancreas (Online) 2010; 11(5):492-493).

**Analgesia**: Contraindicated NSAIDs. Pain triggers more inflammation, and the pain should be relieved. We even suggest , se debe calmar el dolor, sugerimos incluso el “epidural blockage”; Analgesia is crucial (Recommendation A).

**TC – CR:** Intravenous contrast-enhanced computed helical tomography (also called “dynamic” ) after the first 72 hours of the onset of pain {pancreatic (peri) necrosis cannot be detected earlier}.

**ERCP - CPRE:** Endoscopic retrograde cholangiopancreatography – ERCP.

**Poor evolution**: Deterioration of the physical condition / hemodynamic / patient analysis in the early hours of admission despite adequate treatment.

**Pancreatic Profile:** See Attachment 1. Written request to the laboratory with pre-established determinations decided in advance with the clinical analysis service of each hospital: **Urgent Laboratory Service:**

- **Profile PANCREATITIS-Initial.** From the first extracted sample.
- **Profile PANCREATITIS every 12 or 24 hours.** Analytical Re-evaluation of patients during three days.

**Transient Organ Failure (OF*)***: Data from organ failure are resolved in a short period of time after application of appropriate supportive measures (no more than 48 hours after the onset of the AP).

**Persistent Organ Failure (OF)**: Data from organ failure are not resolved in a short period of time after application of appropriate supportive measures (more than 48 hours after the onset of AP).

**Potentially Severe Acute Pancreatitis (PSAP):** A PSAP is defined as an acute pancreatitis with one or more organ failures; i.e., hypotension, respiratory or renal failure or signs of alarm.
