# Supplementary material
Source: Elsevier journal article supplement (https://www.sciencedirect.com/science/article/pii/S2173572712000690)
Supplement: mmc3 [file S2173572712000690:mmc3.doc]

**TABLA 1.**

**CLINICAL CARE PATHWAY FOR ACUTE PANCREATITIS: Recommendations for Early Multidisciplinary Management (AP) 2011**

| **Level of Care / Unit** | **Initial evaluation by the EMERGENCY SERVICES:**  **Day “0** | **Date Day 1: EMERGENCY CARE OR DIGESTIVE OR SURGERY SERVICES** | **Date Day 2:** | **Date Day 3:** |
| --- | --- | --- | --- | --- |
| **1º. Assessment:** | Vital signs; History / physical examination  Apply Algorithm 1. | Vital signs; Fluid balance; assess the Imrie/Ranson signs  APACHE II; PCR/12h; The Atlanta prediction criteria.  APACHE 0, Obesity and age | Vital signs; Fluid balance; assess the Imrie/Ranson signs  APACHE II; PCR/12h; The Atlanta prediction criteria | Supervise the vital signs, supervise organ function, Act early |
| **2º. Medical intervention:**   - **Applying the Recommendations:** “Eight” therapuetic measures: **“PANCREAS”** acronym: (See end of the Doc.) | Identification and admission.  Examination and DD of an “Acute Medical Abdomen”  AP diagnosis and etiology  Identify early organ support failure | AP assessment: through medicine and/or surgery  Identify early organ support failure  “This Pathway should be placed at the head of the patient´s bed and be executed by the medical and nursing teams. “   - Therapeutic measures: **“P.A.N.C.R.E.A.S.”**: Perfusion, Analgesia, Nutrition, Clinical progress-scoring, Diagnostic Radiology -progress, ERCP-CRPE, Antibiotics, and Surgery. See end of the Doc. | Identify early organ support failure.  Therapuetic mesaures: **“P.A.N.C.R.E.A.S.”**: Idem | Identificar fracaso de órganos-soporte precoz  Medidas terapéuticas: **“P.A.N.C.R.E.A.S.”**: Ídem |
| **3º. Laboratory tests:**  *Biochemical panel of functional tests (to be agreed upon)* | Initial analysis. Complete if the AP diagnosis is confirmed: Pancreatic profile | Pancreatic profile/12h (including Basal gasometry without any oxygen contribution)  Monitorized PCR  NOTE: Amilasa and Lipasa to be assessed according to the progess time | Pancreatic profile  Monitorized PCR | Pancreatic profile  PCR |
| **4º. Imaging tests** | Torax Rx  Ultrasound scan of the abdomen | Thorax Rx | Abdominal TAC after 72h from the onset of pain with any severity criteria | With severity signs or criteria, dynamic abdominal TAC |
| **5º. Catheters /**  **Monitoring / Vigilance** | Urinary catheter (Suspicion of severe AP); N-G catheter if symptomatic ileus exists; Invasive monitoring if required (PVC, TA, diuresis, SatO2); Monitoring PCR/12 hours, with severity signs | Normal controls (TA, FC, Diuresis, TA, SatO2 ). Invasive monitoring if required  A central venous line, a nasogastric catheter (NGC) and gastric evacuation are required  Diuresis control with or without a urinary catheter | Normal controls. Invasive monitoring if necessary | Normal controls Invasive monitoring if necessary |
| **6º. Medication / Treatments** | Supplementary O2; analgesia. | No prophylactic antibiotic  O2 per instructions  Analgesia (Rigorous pain control) according to protocol  (Alternative: regional medular blockage, by epidural means)  TVP (HBPM) prophylaxis and y gastrointestinal (IBPs) prophylaxis  *Optimize the prophylaxis in cases with a previous history.*  *The most effective ulcus prophylaxis is early enteral nutrition.*  *Pneumatic intermittent compression should be added to TVP prophylaxis.* | O2 according to instructions; painkillers; continue with HBPM , IBPs. | Support for potencial systematic and organ failures |
| **7º. Nutrition / Fluids** | Intensive volume replacement (caution with risk patients) | Complete diet; IV fluids.  No nutrition | IV fluids; Start nutrition according to protocol (See guidelines) once the patient’s condition has stabilized | Continuous nutritional support (See Guidelines and protocols); IV fluids |
| **8º. Biliar AP** | *In the case of colangitis: antibiotherapy+urgent CPRE (24h) | *With colangitis: urgent antibiotherapy +CPRE (24h)  Surgery to remove biliary obstructions if CPRE is unavailable | *When there is data on biliary obstruction: assess antibiotherapy and early CPRE (<72h) | *When there is data on biliary obstruction: assess antibiotherapy and early CPRE (<72h |
| **9º. Information / Teaching** | Explain to the patient, patient’s family, and associates the characteristics of this illness | Explain the potential progress and dietetic rest  Future procedures | Explain the prognosis; and the need for CT | Explain the progress and action to take;  Move the patient to a hospital room for final hospitalization.  TAC results and severity level |
| **10º. Discharge plan: Sent home; hospitalized** | Not applicable | Initial scoring | Final instructions for hospitalization | Final evaluation: to Digestive Medicine, Surgery or ICU |
| **11º. Medical Objectives / Nursing** | Maintain the vital signs and begin stratification (Light or severe) | Vital signs, especially diuresis; evlauation and pain control | Stabilize vital signs; improve organ functions | Stabilize vital signs; optimum oxygenation and hydration  If this is not done, advise the ICU |
| **12º. Alarm signs** (Indicate that patients require greater medical attention = Alarm signs)  (Apply the AP Algorithm) | **Clinical:** Abdominal,defense, pleural effusion on auscultation, altered level of consciousness, absence of bowel sounds, age and IMC <26. | 2**. Radiological**: Pleural effusion on auscultation (Rx), Free fluid (abdominal ultrasound) | 3. **Analytical:** CRP >150mgr/L or progressive increase in 48h, Hematocrit >44% | 4. **Prognostic Scale:** BISAP; APACHE II >8; APACHE-O >6, Glasgow-Ranson >3 |
| **13º Early severity criteria; Evaluation and admission to ICU.**  It is based on the parameters for **3 Organ Failures (OF):** simple, practical and efficient | These OF define:  **Potentially Severe Acute Pancreatitis (PSAP)**  Call the ICU in case of fulminant AP (CAP from the onset) | 1. Hypotension: PAS < 90mmHg basal; or reduction by 40 mmHg of basal SAP  2.Respiratory I.: PaO2 <60 mmHg basal (without O2)  3. Acute renal I.: Cr >2mgr/dl (≥ 171 mmol / L) or basal increase x 2; or Oliguria <30 ml in 3 h; or 700 ml in 24h | **PSAP: One or more PERSISTENT OF**  Definition: An OF that is not resolved in a short period of time ((>48 h from the onset of the AP) | **PSAP: One or more persistent OF** |
| The “eight” easy to remember measures according to the **“P.A.N.C.R.E.A.S.”** acronym **(**Khaliq et al. J Pancreas (Online) 2010**)**:   1. **P**erfusión: Rapidly restoring intravascular volume in the first 48 hours is essential. A greater need of fluids is a sign of alarm. Both hypo and hyper-hydration are greater than mortality; consequently, greater **continuous hemodynamic control** is required. Optional vasopressor drugs. Oxygenation is needed for adjusting the saturation > 95% in severe pancreatitis. 2. **A**nalgesia: This is very important. Controlled patient analgesia; or analgesia on demand, including opioids. 3. **N**utritión: Enteral nutrition in the first 48 hours (preferably via nasojejunal rather than gastric) reduces mortality in severe acute pancreatitis. 4. **C**linical evolution-evaluation: Rules for evaluating and stratifying cases such as BISAP, el APACHE II or APACHE-O are available. These tables should be followed in emergency and digestive care areas, according to the severity of the pancreatitis 5. **R**adiology: Ultrasound for detecting gallstones, choledocholithiasis, and local complications (free peritoneal fluid). ***Computed tomography with emphasized contrast (TC-CR)*** after the first 72 hours following the onset of pain, is useful for determining the magnitude of the necrosis. ***Percutaneous catheter drainage guided by ultrasound or CT*** is useful for managing necrosis, collections and also as a time bridge until surgery. 6. **E**RCP-CPRE: If cholangitis is present it should be performed during the first 24 hours or in the case of SAP with common bile duct obstruction in the first 48 hours. 7. **A**ntibiotics: There is little evidence to support the prophylactic role of antibiotics in the prevention of infected necrosis. As a general rule, treatment with empirical antibiotics can begin after 14 days if there is suspicion of infection, following culture testing. However, the appearance of de SIRS after the first week in the case of AP with necrosis raises the suspicion of infection and it is the appropriate time to indicate an antibiotic after obtaining culture samples. In addition, the intra-abdominal pressure figures (IAP) are essential in this sense, because it is one of the markers indicating that peri/pancreatic inflammation has become infected phlegmon, after cultures have been taken. It is evident that obtaining purulent material and/or culture and antibiogram of suctioned material, by means of percutaneous ultrasound scanner or aspiration with fine needle guided CT (PAAF), should be useful for orientating the antibiotherapy option 8. **S**urgery: Indicated in multi-organ failure with necrosis that does not respond to conservative treatment including drainage by means of a percutaneous catheter, the existence of compartment syndrome (IAP > 25 mmHg) with persistent MOF, infected necrosis, pancreatic abscess and the perforation of the intestine [Error: Reference source not found, Error: Reference source not found. Error: Reference source not found]. In this case monitored measurements of IAP in a critical patient with AP is essential, because it indicates the evolution of phlegmon to an abdominal compartment syndrome, regardless of whether it’s infected or not, and it indicates complementary examinations (repeat TAC if applicable) and surgery. The important message is to try to “gain time” before performing early surgery. Pseudo-aneurysm of surrounding vessels with or without haemorrhage can be treated with embolization techniques. | | | | |

**Transient Organ Failure (OF*)***: Data from organ failure are resolved in a short period of time after application of appropriate supportive measures (no more than 48 hours after the onset of the AP).

**Persistent Organ Failure (OF)**: Data from organ failure are not resolved in a short period of time after application of appropriate supportive measures (more than 48 hours after the onset of AP).

- High index of suspicion!: Free peritoneal fluid;; and other rare symptoms.

**High index of suspicion!** Be alert to unusual symptoms: pancreatic encephalopathy (Estrada et al. Pancreatic encephalopathy. Acta Neurol Scand 1979; 59: 135-139. Associated with high levels of Lipase in LCR.

**Amylase** >400 mg/dl (three to four times the normal value, and remain elevated in the plasma, unless there is acute renal failure).

**Lipasa** 200 mg/dl (twice the serum value). Sarner M. Clinical diagnosis of Intersticial –edematous- Pancreatitis. En: Acute Pancreatitis, Editor Edward L. Bradley III; Raven Press 1994, New York, Chapter 33, p. 255-259).
